# Supplementary material for: Induction of fatigue-like behavior by pelvic irradiation of male mice alters cognitive behaviors and BDNF expression
Source: PubMed Central journal article supplement (PMC7332074; doi:10.1371/journal.pone.0235566), 2020-07-02

I=Irradiation  
 S=Sham  
 B=Blank  
 P=Pooled

### Gel 1 probed for BDNF

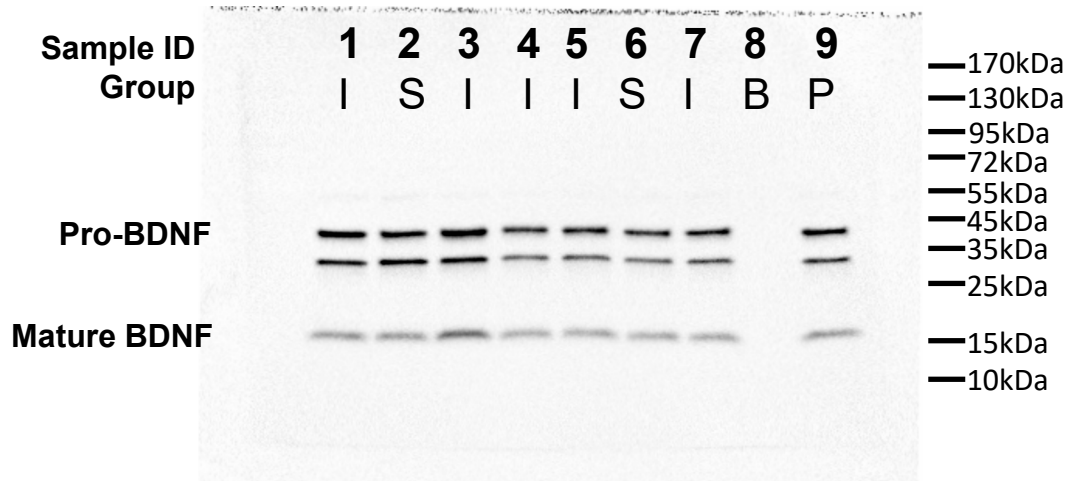

### Gel 1 reprobed for GAPDH

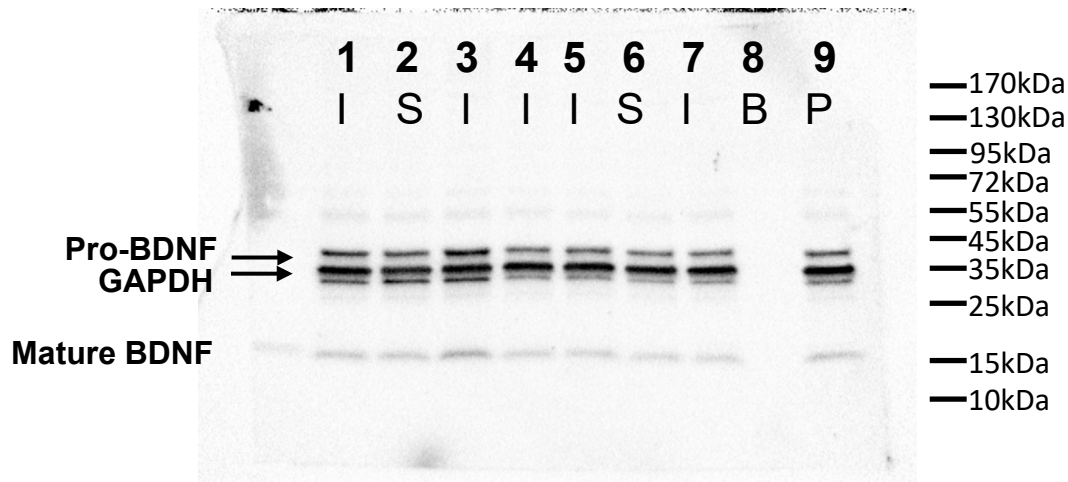

## Gel 2 probed for BDNF

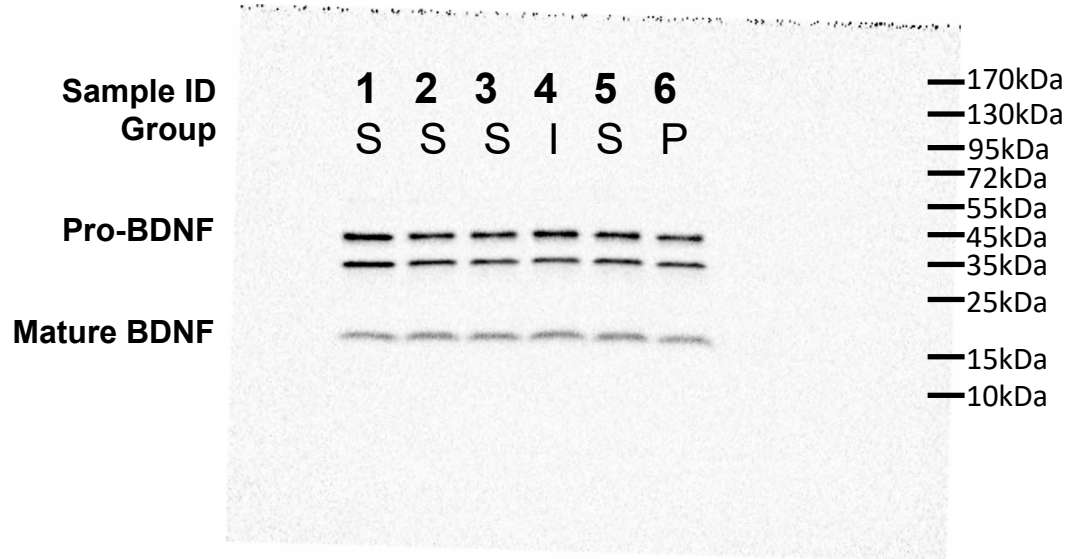

## Gel 2 reprobed for GAPDH

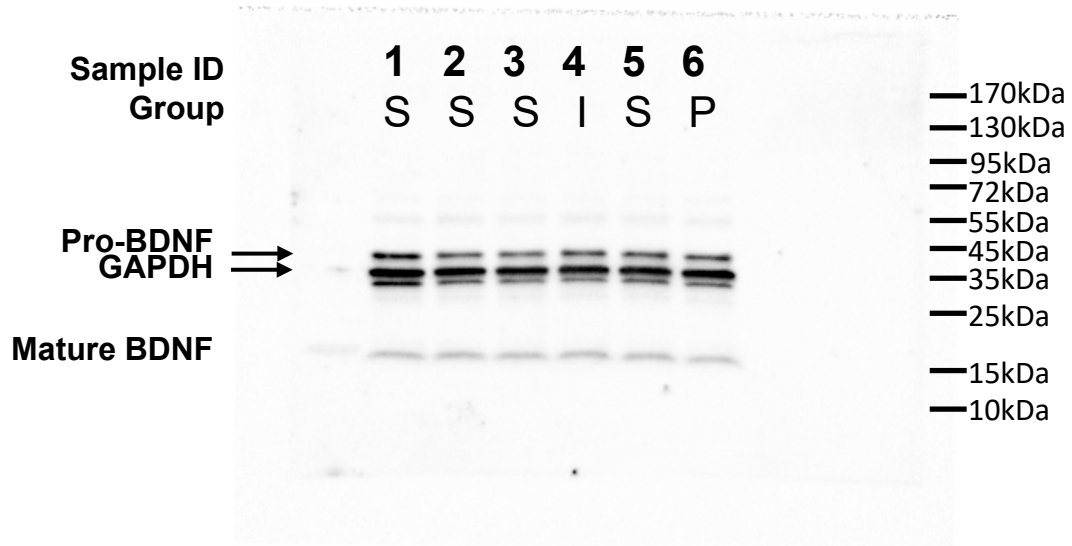

### Gel 3 probed for BDNF

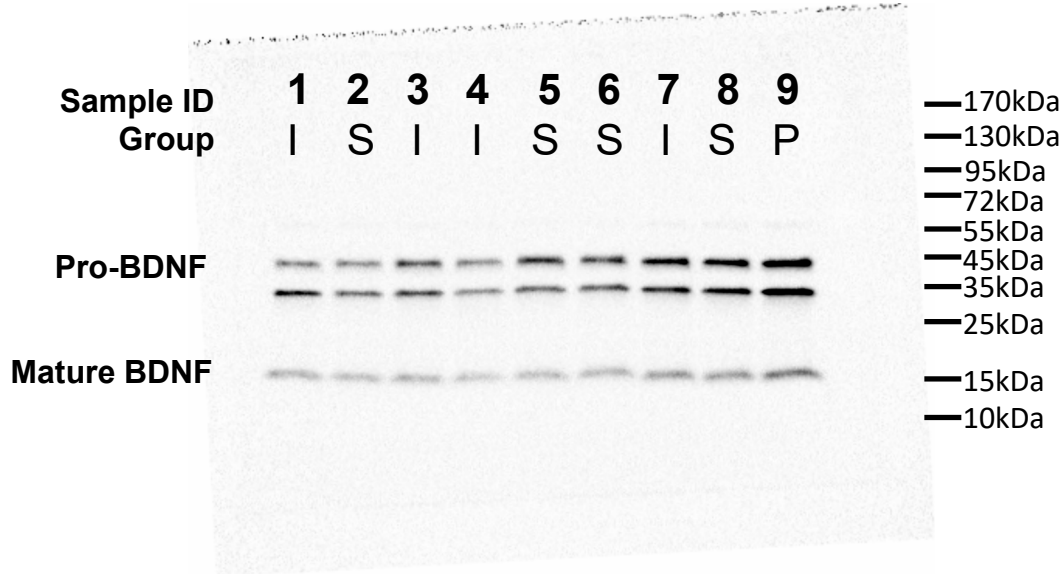

### Gel 3 reprobed for GAPDH

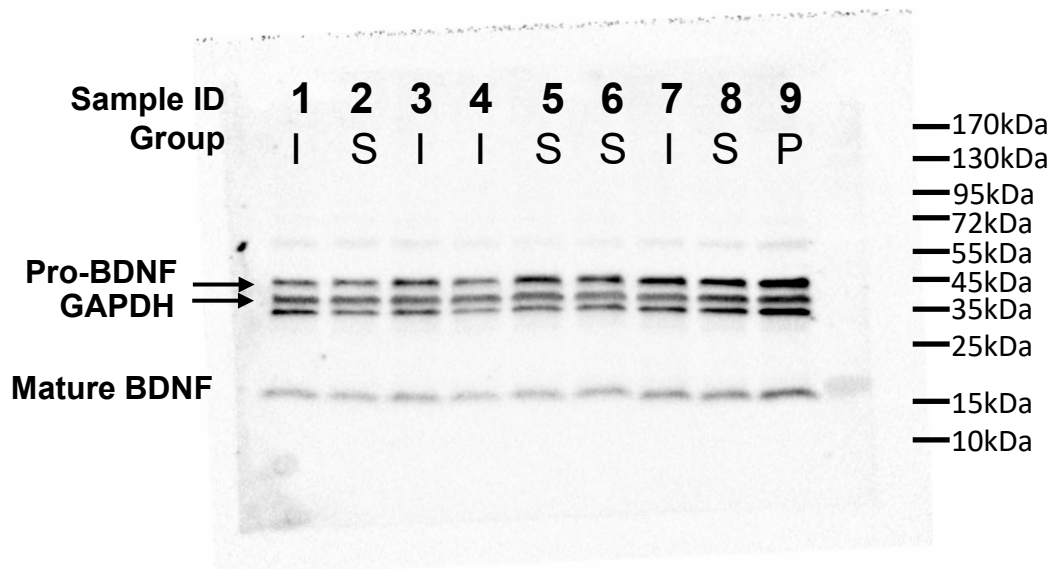

### Gel 4 probed for BDNF

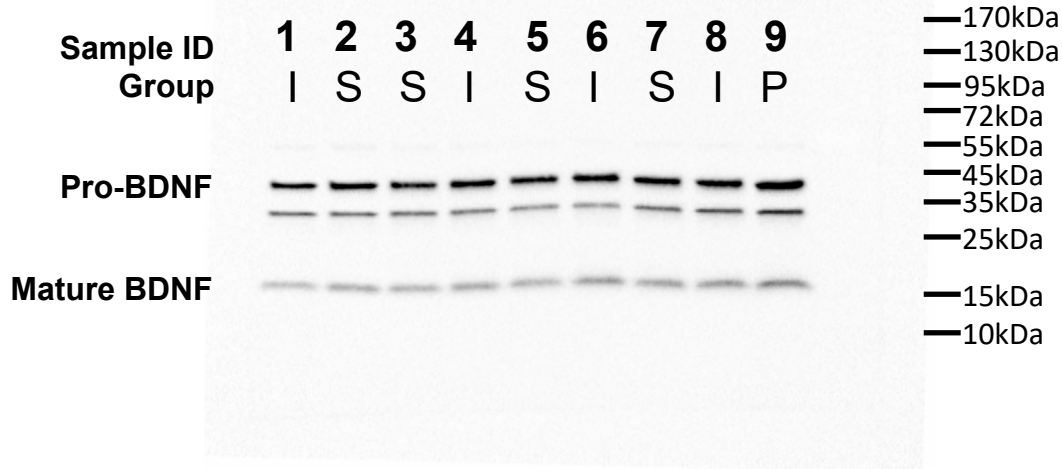

### Gel 4 reprobed for GAPDH

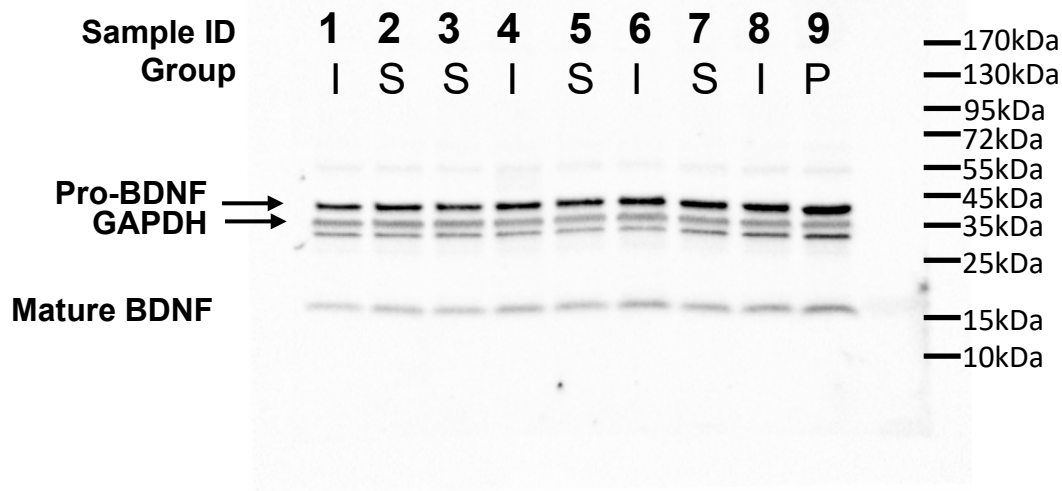

## Gel 5 probed for BDNF

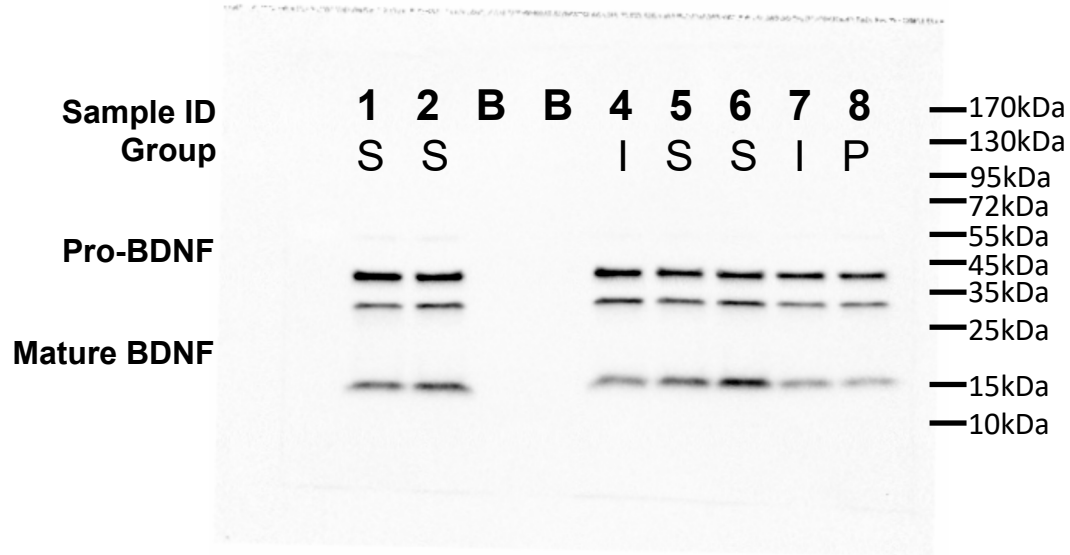

## Gel 5 reprobed for GAPDH

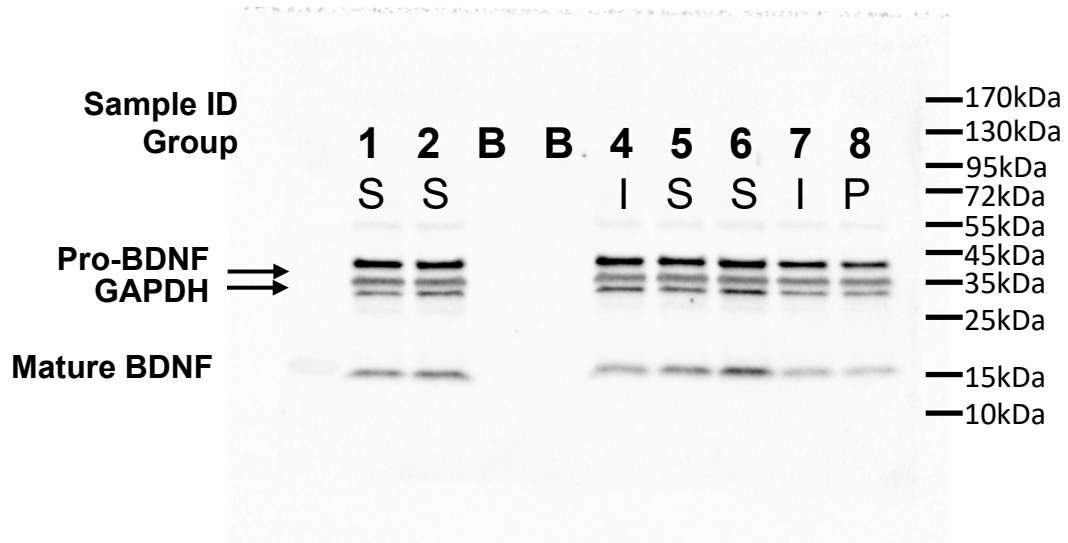

## Gel 6 probed for BDNF

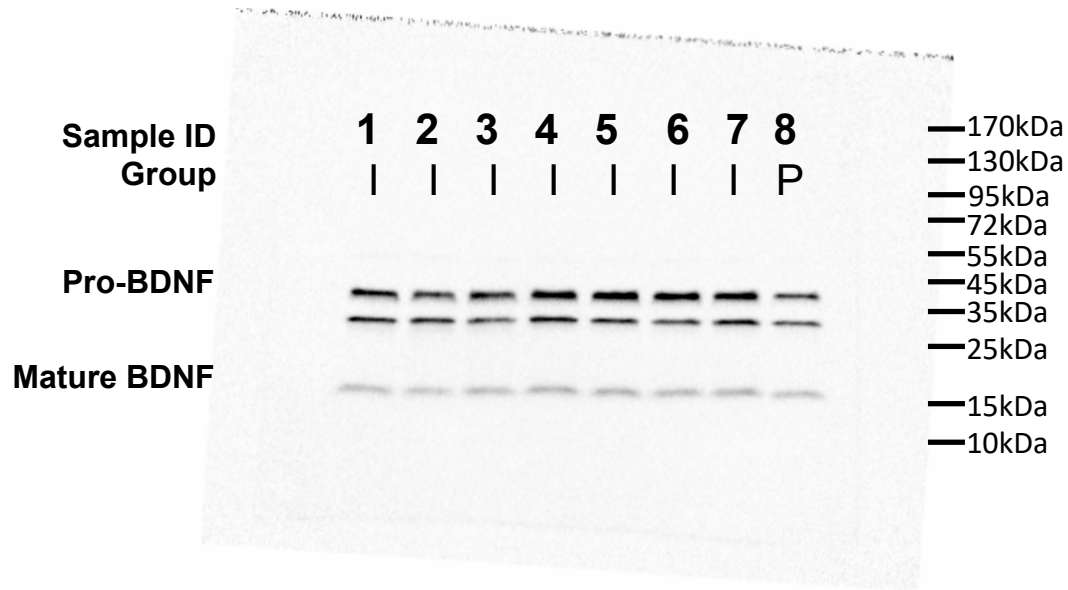

## Gel 6 reprobed for GAPDH

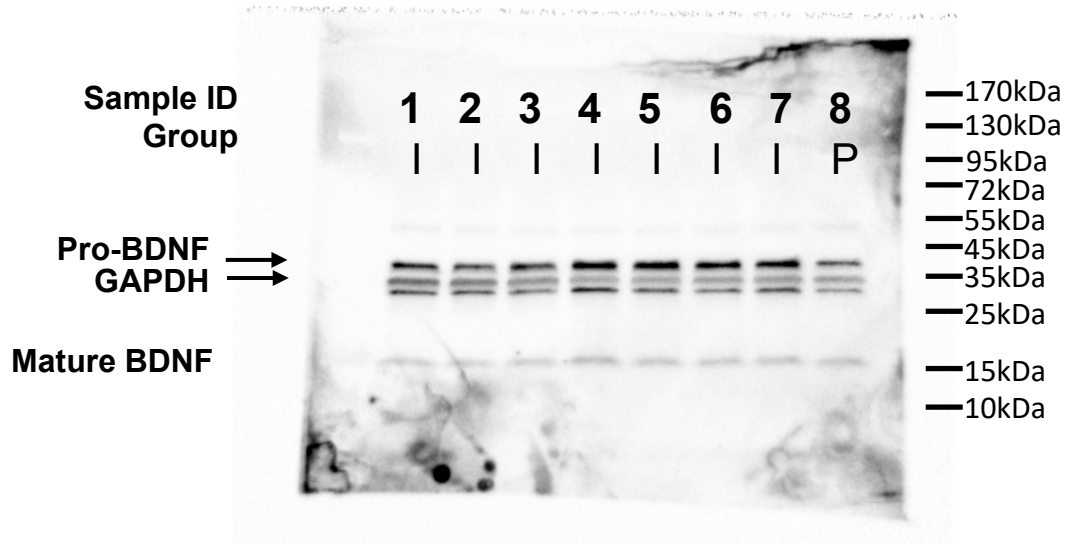

### Gel 7 probed for BDNF

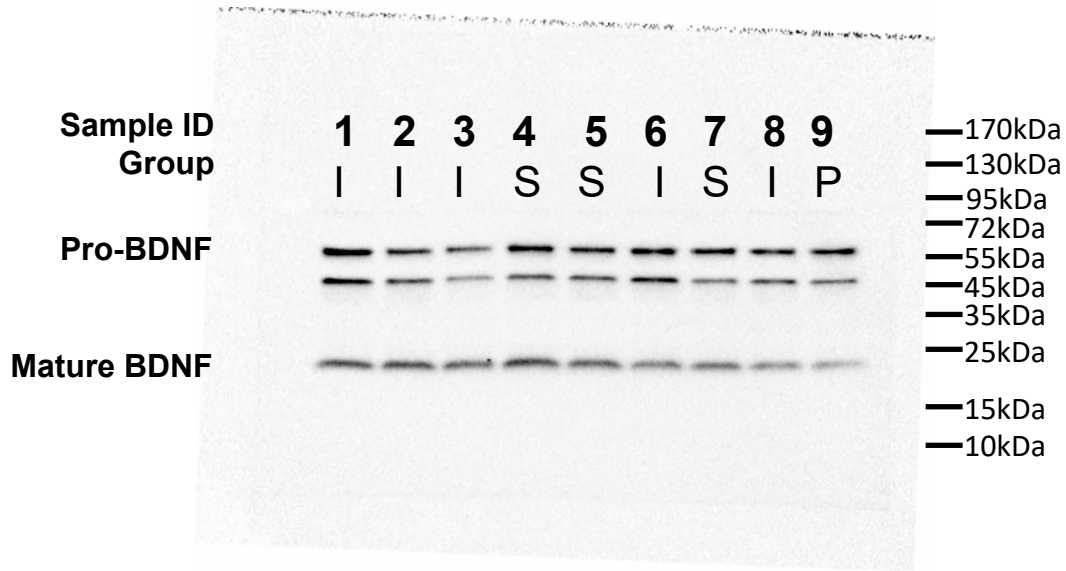

### Gel 7 reprobed for GAPDH

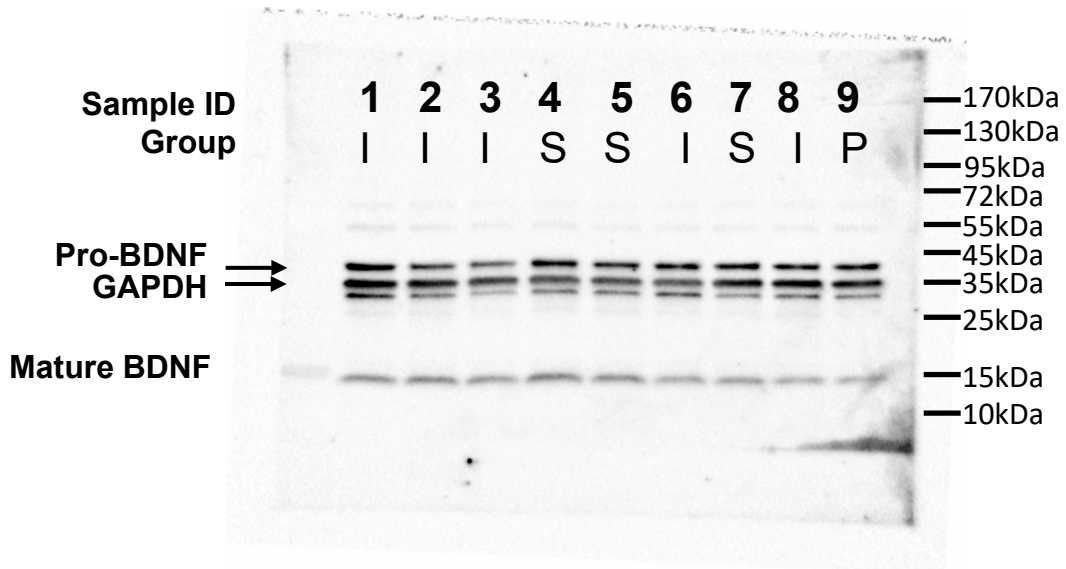

## Gel 8 probed for BDNF

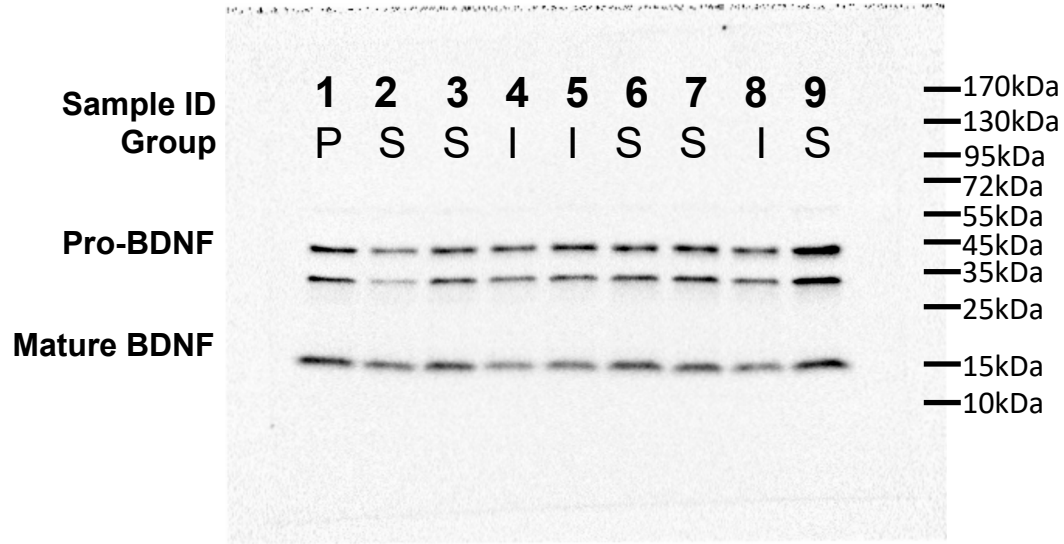

## Gel 8 reprobed for GAPDH

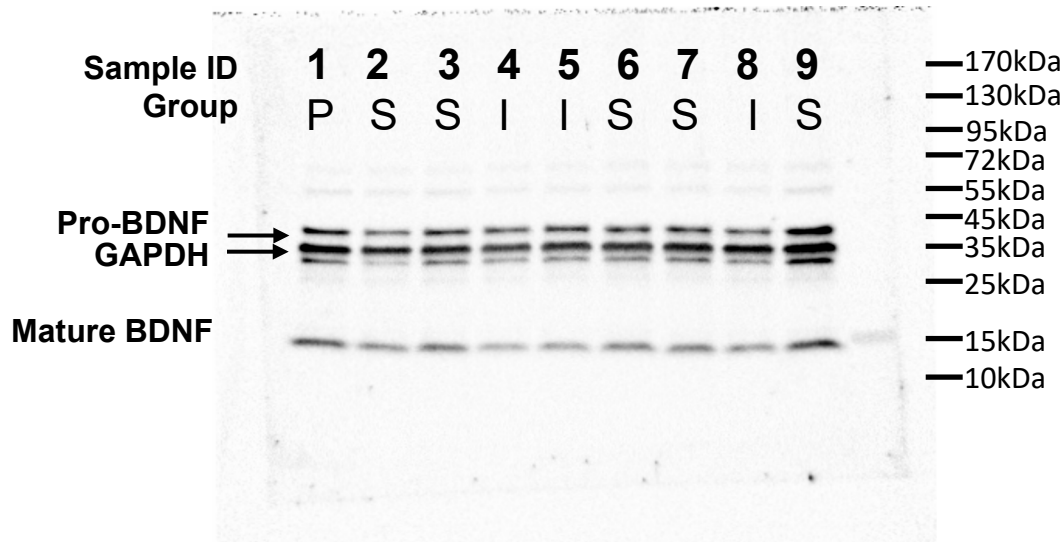



### Gel 9 probed for BDNF

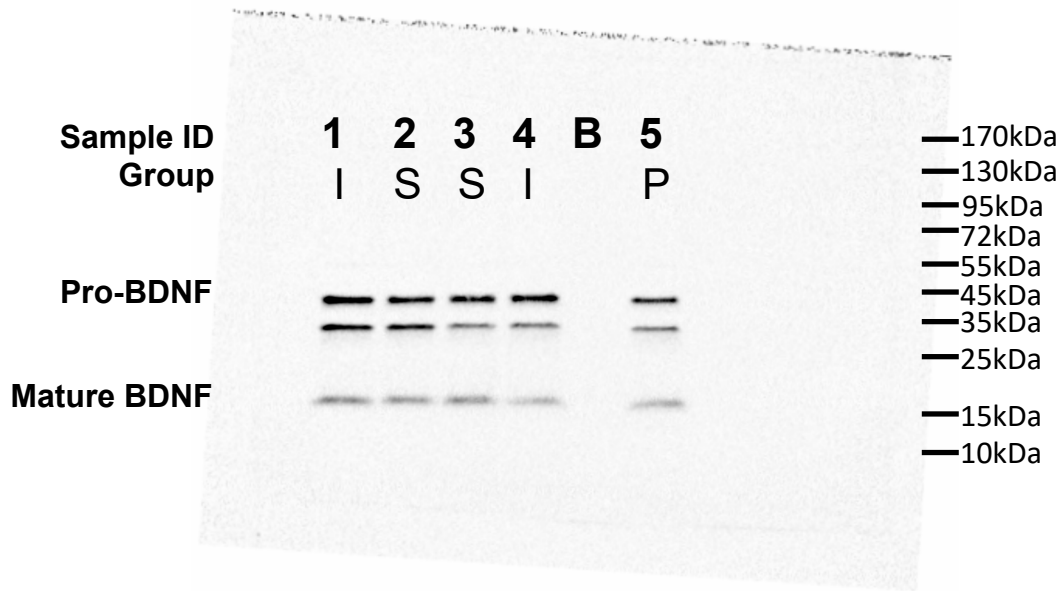

### Gel 9 reprobed for GAPDH

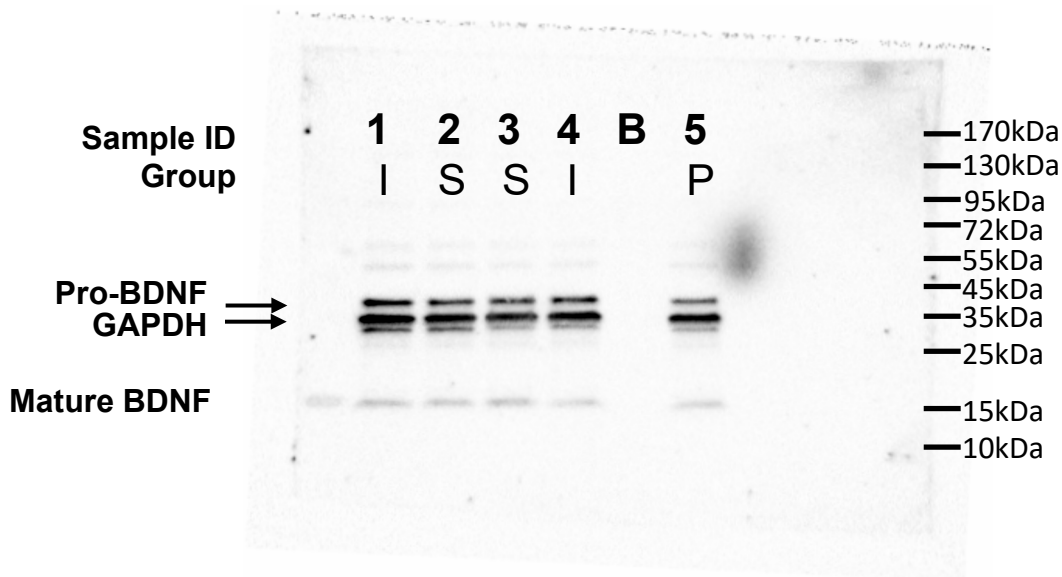

Supplement: pone.0235566.s008.pdf [file pone.0235566.s008.pdf]
